# Supplementary material for: Seroprevalence of neutralizing antibodies against adenovirus type 14 and 55 in healthy adults in Southern China
Source: PubMed Central journal article supplement (PMC5520307; doi:10.1038/emi.2017.29), 2017-06-07
Supplement: emi201729x1.pdf [file emi201729x1.pdf]

1 **Supplementary Figure S1**

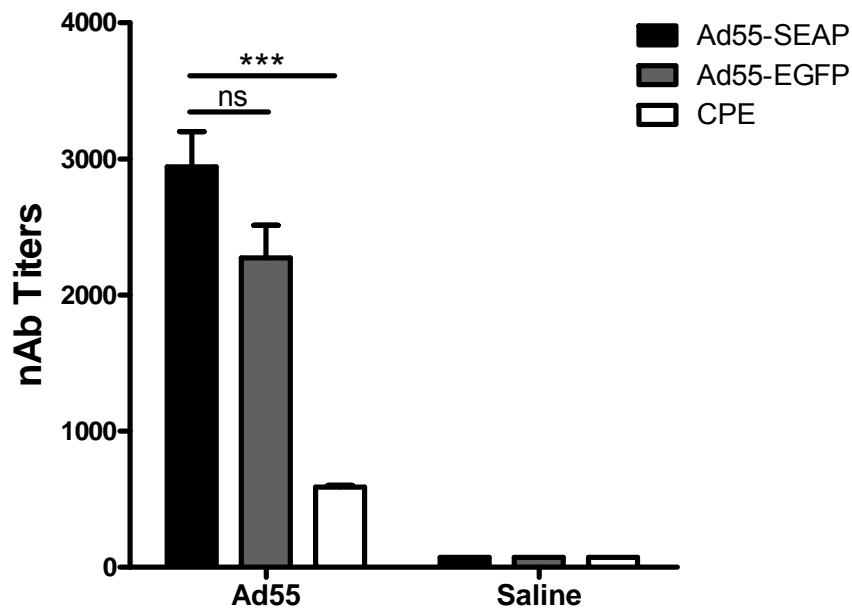

2

3 **Figure S1. MN assay based on Ad55-SEAP or Ad55-EGFP was**

4 **more sensitive than that based on CPE.** Serums of mice immunized

5 with inactivated Ad55 viral particles or saline were serially diluted and

6 incubated with Ad55-SEAP, Ad55-EGFP, or a replication-competent

7 Ad55 $\Delta$ E3. The mixtures were infected into HEK293 cells. 24 hours later,

8 SEAP activity in the mediums of Ad55-SEAP-infected cells and EGFP in

9 the Ad55-EGFP-infected cells were detected. 7 days later, the CPE

10 phenomenon in Ad55 $\Delta$ E3-infected cells were recorded. The nAb titers

11 were calculated as the dilutions that inhibited 50% of reporter gene

12 expression or CPE. The comparison between groups was performed with

13 Mann-Whitney test, and a *P*-value < 0.05 was considered statistically

14 significant. \*\*\*, *P* < 0.001. ns, not significant.
